# Supplementary figures and images for: Toward a Taxonomy of Virus-ncRNAs Interactions in an RNA World for Disentangling Some Tiny Secrets of Dengue Virus
Source: Preprints.org preprint supplement (doi:10.20944/preprints202111.0385.v1), 2021-11-22

**A**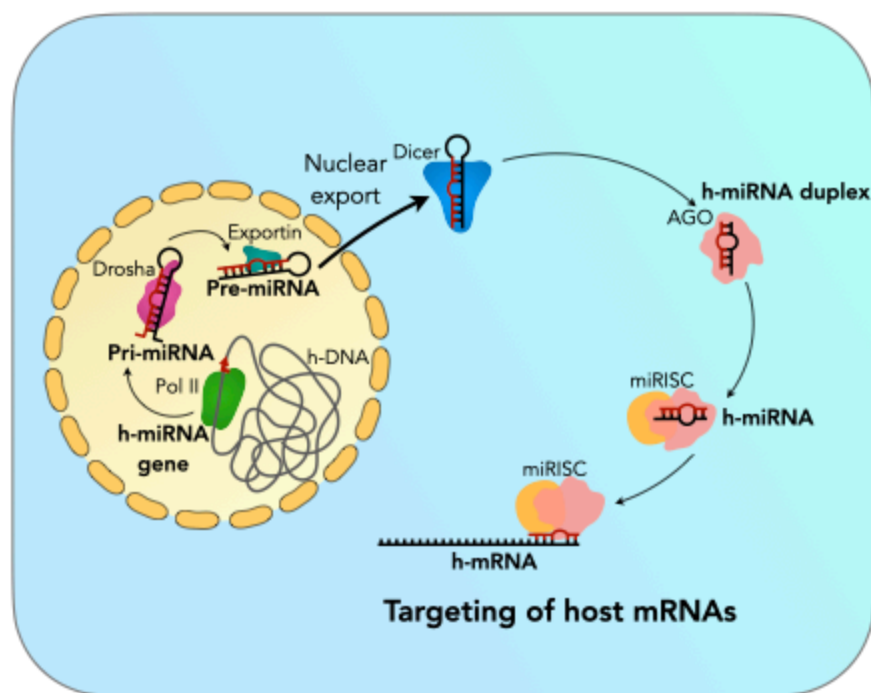**B**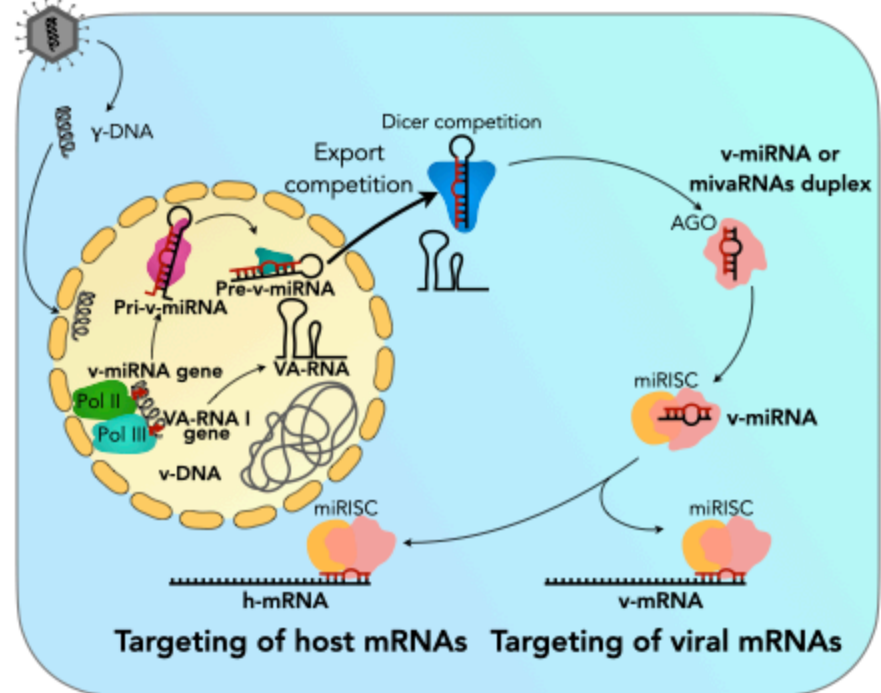**C**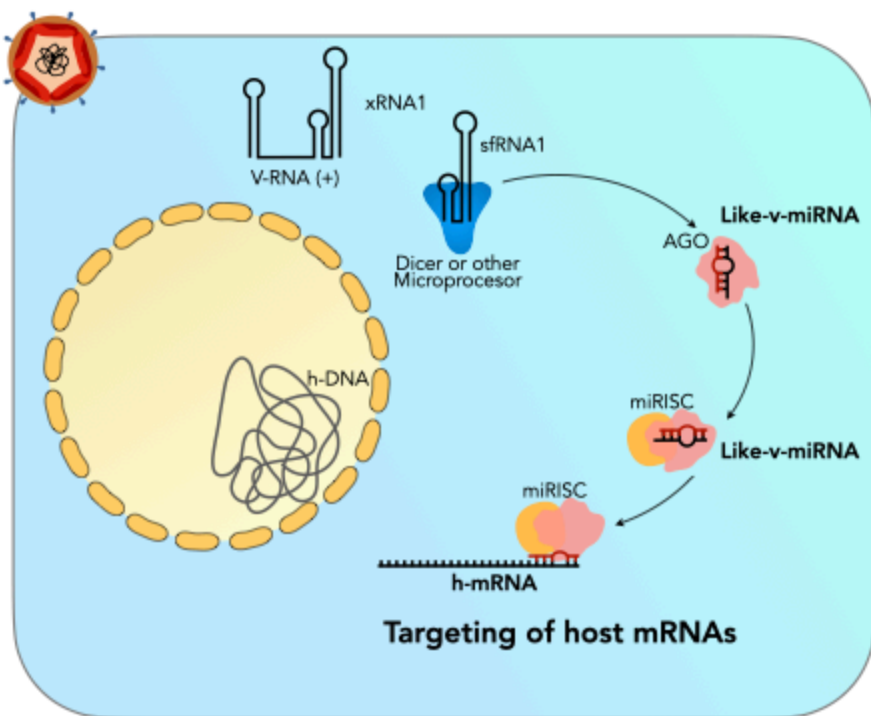**D**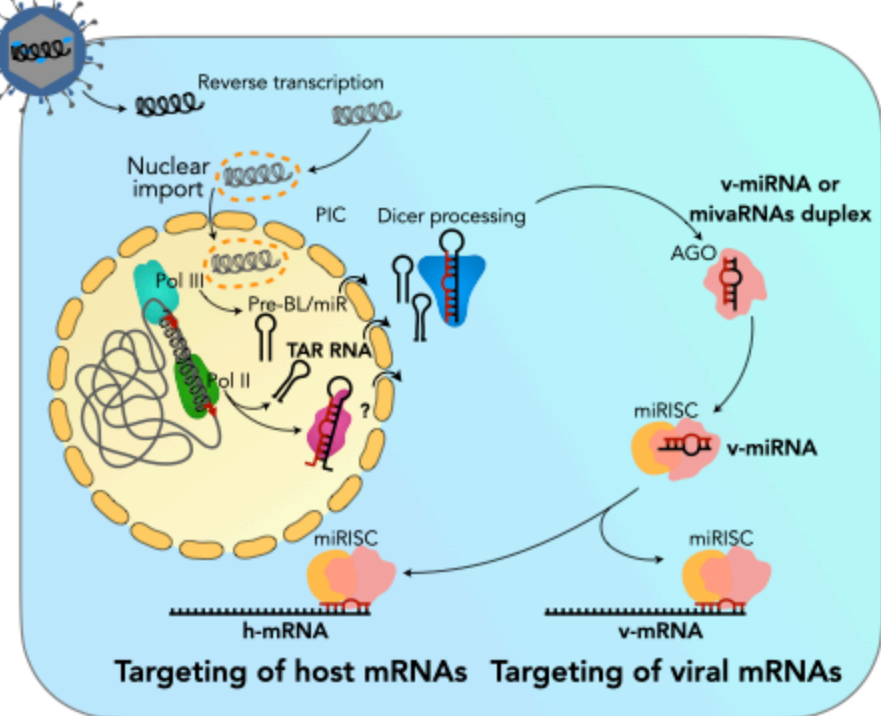

Supplement: Supplementary file 2 [file supplementary]
